# Supplementary material for: Procedure-specific prognostic impact of micropapillary subtype may guide resection strategy in small-sized lung adenocarcinomas: a multicenter study
Source: PubMed Central journal article supplement — Ther Adv Med Oncol. 2020 Jul 3;12:1758835920937893. doi: 10.1177/1758835920937893 (PMC7336827; doi:10.1177/1758835920937893), 2020-07-03
Supplement: Supplemental_data.docxTAO.pdf [file Supplemental_data.docxTAO.pdf]

Table 1. The procedures for lymph nodes dissection of lobectomy, segmentectomy and wedge resection

| Surgical procedures                                                                                           | Dissection of the lymph nodes                                                                                                                                                                                                                                                                                                                                                                                                                           |
|---------------------------------------------------------------------------------------------------------------|---------------------------------------------------------------------------------------------------------------------------------------------------------------------------------------------------------------------------------------------------------------------------------------------------------------------------------------------------------------------------------------------------------------------------------------------------------|
| Lobectomy                                                                                                     | All patients (633) underwent systemic lymph node dissection, including hilar lymph node and at least three stations of mediastinal lymph nodes from stations 2R, 3A, 4R, 7, 8, 9 for the right side and stations 4L, 5, 6, 7, 8, 9 for the left side, respectively.                                                                                                                                                                                     |
| Segmentectomy                                                                                                 | Most patients underwent systematic mediastinal lymphadenectomy (79.6%, 43/54), including hilar lymph node and at least three stations of mediastinal lymph node from stations 2R, 3A, 4R, 7, 8, 9 for the right side and stations 4L, 5, 6, 7, 8, 9 for the left side, respectively. Eleven patients did not undergo dissection of the hilar lymph node because of technical infeasibility, they only performed systematic mediastinal lymphadenectomy. |
| Wedge resection                                                                                               | Most patients (78.8%, 67/85) underwent selective dissection of mediastinal lymph node, the remaining 18 patients underwent selective lymph node sampling after a comprehensive evaluation by the surgeons.                                                                                                                                                                                                                                              |
| Intrapulmonary lymph nodes in the removed lung tissue were evaluated in postoperative pathology examinations. |                                                                                                                                                                                                                                                                                                                                                                                                                                                         |

Table 2. The scanning technical characteristics of seven hospitals

| Hospitals                                                                   | Scanning technical characteristics                                                                                                                                                                                                                                                                                                                                                                                        |
|-----------------------------------------------------------------------------|---------------------------------------------------------------------------------------------------------------------------------------------------------------------------------------------------------------------------------------------------------------------------------------------------------------------------------------------------------------------------------------------------------------------------|
| 1. Shanghai Pulmonary Hospital                                              | The tube voltage was 120 kVp, tube current adjusted automatically, pitch was 0.969, reconstruction thickness was 1.0 mm, and reconstruction interval was 1.0 mm. Furthermore, preoperative chest CT scans were obtained using scanners with 64-detector rows (Somatom Definition AS [Siemens Medical Systems, Erlangen, Germany]).                                                                                        |
| 2. Jiangsu Cancer Hospital                                                  | Tube voltage was 120 kVp, tube current adjusted automatically, pitch was 0.969, reconstruction thickness was 0.625mm, and reconstruction interval was 1.0 mm. Furthermore, preoperative chest CT scans were obtained using scanners with 64-detector rows (GE Light Speed VCT 64 CT Scanner).                                                                                                                             |
| 3. Zhejiang Cancer Hospital                                                 | Tube voltage was 120kVp, tube current adjusted automatically, pitch was 1.0, reconstruction thickness was 1.0mm, and reconstruction interval was 1.0mm. Furthermore, preoperative chest CT scans were obtained using scanners with 64-detector rows (Somatom Definition Flash [Siemens Medical Systems, Erlangen, Germany]), or with 16-detector rows (Somatom Sensation16 [Siemens Medical Systems, Erlangen, Germany]). |
| 4. Jiangsu Province Hospital                                                | Tube voltage was 120 kVp, tube current adjusted automatically, pitch was 1, reconstruction thickness was 1.0 mm, and reconstruction interval was 0.8-1.0 mm. Furthermore, preoperative chest CT scans were obtained using scanners with 64-detector rows (Somatom Definition AS [Siemens Medical Systems, Erlangen, Germany]).                                                                                            |
| 5. The Second Affiliated Hospital of Zhejiang University School of Medicine | Tube voltage was 120 kVp, tube current adjusted automatically, pitch was 0.75, reconstruction thickness was 1.5 mm, and reconstruction interval was 1.5 mm. Furthermore, preoperative chest CT scans were obtained using scanners with 320-detector rows (Aquilion/ONE [Canon Medical System, Nasu Japan]).                                                                                                               |
| 6. Affiliated Hospital of Nantong University                                | Tube voltage was 120 kVp, tube current adjusted automatically, pitch was 0.891, reconstruction thickness was 1.0 mm, and reconstruction interval was 1.0 mm. Furthermore, preoperative chest CT scans were obtained using scanners with 64-detector rows (Philips                                                                                                                                                         |

---

|                                             |                                                                                                                                                                                                                                                                                                                            |
|---------------------------------------------|----------------------------------------------------------------------------------------------------------------------------------------------------------------------------------------------------------------------------------------------------------------------------------------------------------------------------|
|                                             | Brilliance CT [Philips Medical Systems, Cleveland, America]).                                                                                                                                                                                                                                                              |
| 7. The First People's Hospital of Changzhou | Tube voltage was 120 kVp, tube current adjusted automatically, pitch was 1, reconstruction thickness was 5.0 mm, and reconstruction interval was 5.0 mm. Furthermore, preoperative chest CT scans were obtained using scanners with 64-detector rows (Somatom Definition AS [Siemens Medical Systems, Erlangen, Germany]). |

---

Table 3. Clinicopathologic characteristics of patients with lung adenocarcinoma  $\leq 2$  cm presenting as pure solid nodules with different percentage of micropapillary subtype

| Variables                | Percentage of micropapillary subtype |                     |                     | <i>P</i> |
|--------------------------|--------------------------------------|---------------------|---------------------|----------|
|                          | < 5%<br>(N = 318)                    | 5-20 %<br>(N = 317) | > 20 %<br>(n = 137) |          |
| Age                      |                                      |                     |                     |          |
| Mean $\pm$ SD            | 60 $\pm$ 8.9                         | 59.7 $\pm$ 9.7      | 59 $\pm$ 10         | 0.575    |
| $\leq 65$                | 240 (75.5)                           | 232 (73.2)          | 95 (56.5)           | 0.394    |
| $> 65$                   | 78 (24.5)                            | 85 (26.8)           | 42 (43.5)           |          |
| Sex                      |                                      |                     |                     | 0.255    |
| Male                     | 145 (45.6)                           | 165 (52.1)          | 65 (47.4)           |          |
| Female                   | 173 (54.4)                           | 152 (47.9)          | 72 (52.6)           |          |
| Smoking                  |                                      |                     |                     |          |
| Non-smoker               | 241 (75.8)                           | 243 (76.7)          | 99 (72.3)           | 0.6      |
| Smoker                   | 77 (24.2)                            | 74 (23.3)           | 38 (27.7)           |          |
| COPD                     |                                      |                     |                     | 0.26     |
| Absent                   | 284 (89.3)                           | 274 (86.4)          | 115 (83.9)          |          |
| Present                  | 34 (10.7)                            | 43 (13.6)           | 22 (16.1)           |          |
| Cardiovascular disease   |                                      |                     |                     | 0.786    |
| Absent                   | 275 (86.5)                           | 268 (84.5)          | 117 (85.4)          |          |
| Present                  | 43 (13.5)                            | 49 (15.5)           | 20 (14.6)           |          |
| Diabetes mellitus        |                                      |                     |                     | 0.199    |
| Absent                   | 291 (91.5)                           | 294 (92.7)          | 120 (87.6)          |          |
| Present                  | 27 (8.5)                             | 23 (7.3)            | 17 (12.4)           |          |
| % pre FEV1               |                                      |                     |                     | 0.332    |
| $> 70$                   | 299 (94)                             | 304 (95.9)          | 127 (92.7)          |          |
| $\leq 70$                | 19 (6)                               | 13 (4.1%)           | 10 (7.3)            |          |
| CEA                      |                                      |                     |                     | 0.004    |
| $\leq 10$ ng/ml          | 296 (93.1)                           | 269 (84.9)          | 119 (86.9)          |          |
| $>10$ ng/ml              | 22 (6.9)                             | 48 (15.1)           | 18 (13.1)           |          |
| Tumor location           |                                      |                     |                     | 0.214    |
| Upper and middle         | 207 (65.1)                           | 205 (64.7)          | 78 (56.9)           |          |
| Lower                    | 111 (34.9)                           | 112 (35.3)          | 59 (43.1)           |          |
| VATS                     |                                      |                     |                     | 0.647    |
| Yes                      | 271 (85.2)                           | 266 (83.9)          | 112 (81.8)          |          |
| No                       | 47 (14.8)                            | 51 (16.1)           | 25 (18.2)           |          |
| Surgical procedures      |                                      |                     |                     | 0.6      |
| Lobectomy                | 266 (83.6)                           | 252 (79.5)          | 115 (83.9)          |          |
| Segmentectomy            | 19 (6)                               | 25 (7.9)            | 10 (7.3)            |          |
| Wedge resection          | 33 (10.4)                            | 40 (12.6)           | 12 (8.8)            |          |
| Tumor size, radiological |                                      |                     |                     | 0.018    |
| $\leq 1$ cm              | 98 (30.8)                            | 67 (21.1)           | 33 (24.1)           |          |
| 1-2 cm                   | 220 (69.2)                           | 250 (78.9)          | 104 (75.9)          |          |
| VPI                      |                                      |                     |                     | 0.103    |
| Absent                   | 221 (69.5)                           | 198 (62.5)          | 84 (61.3)           |          |

|                   |            |            |            |         |
|-------------------|------------|------------|------------|---------|
| Present           | 97 (30.5)  | 119 (37.5) | 53 (38.7)  |         |
| Lepidic subtype   |            |            |            | 0.007   |
| Absent            | 220 (69.2) | 227 (71.6) | 114 (83.2) |         |
| Present           | 98 (30.8)  | 90 (28.4)  | 23 (16.8)  |         |
| Acinar subtype    |            |            |            | < 0.001 |
| Absent            | 86 (27)    | 34 (10.7)  | 38 (27.7)  |         |
| Present           | 232 (73)   | 283 (89.3) | 99 (72.37) |         |
| Papillary subtype |            |            |            | 0.111   |
| Absent            | 118 (37.1) | 106 (33.4) | 37 (27)    |         |
| Present           | 200 (62.9) | 211 (66.6) | 100 (73)   |         |
| Solid subtype     |            |            |            | 0.495   |
| Absent            | 237 (74.5) | 248 (78.2) | 107 (78.1) |         |
| Present           | 81 (25.5)  | 69 (21.8)  | 30 (21.9)  |         |
| LN status         |            |            |            | 0.012   |
| N0                | 290 (91.2) | 282 (89)   | 109 (79.6) |         |
| N1                | 17 (5.3)   | 21 (6.6)   | 16 (11.7)  |         |
| N2                | 11 (3.5)   | 14 (4.4)   | 12 (8.7)   |         |

---

COPD, chronic obstructive pulmonary disease; FEV1, forced expiratory volume in one second; CEA, carcinoembryonic antigen; VPI, visceral pleural invasion; VATS, video-assisted thoracic surgery; LN, lymph node; SD, standard deviation.

---

Table 4. Cox proportional-hazards regression model for recurrence-free survival and overall survival in patients with lung adenocarcinoma ≤ 2 cm with different percentage of micropapillary subtype presented as pure solid nodules

| Variables                                       | Recurrence-free survival |                     |          | Overall survival |                     |          |
|-------------------------------------------------|--------------------------|---------------------|----------|------------------|---------------------|----------|
|                                                 | Univariate               | Multivariate        |          | Univariate       | Multivariate        |          |
|                                                 | <i>P</i>                 | HR (95%CI)          | <i>P</i> | <i>P</i>         | HR (95%CI)          | <i>P</i> |
| <b>Percentage of MIP of ≤ 5% (n = 439)</b>      |                          |                     |          |                  |                     |          |
| Age (> 65 vs. ≤ 65)                             | 0.304                    |                     |          | 0.102            |                     |          |
| Gender (male vs. female)                        | 0.148                    |                     |          | 0.413            |                     |          |
| Smoking (current or ex vs. non-smoker)          | 0.454                    |                     |          | 0.201            |                     |          |
| COPD (present vs. absent)                       | 0.512                    |                     |          | 0.064            | 1.5 (0.757-2.971)   | 0.245    |
| Cardiovascular disease (present vs. absent)     | 0.565                    |                     |          | 0.126            |                     |          |
| Diabetes mellitus (present vs. absent)          | 0.488                    |                     |          | 0.729            |                     |          |
| FEV1 % (> 70 vs. ≤ 70)                          | 0.877                    |                     |          | 0.806            |                     |          |
| CEA (> 10 vs. ≤ 10 ng/ml)                       | 0.507                    |                     |          | 0.175            |                     |          |
| VPI (present vs. absent)                        | 0.393                    |                     |          | 0.217            |                     |          |
| VATS (yes vs. no)                               | 0.554                    |                     |          | 0.999            |                     |          |
| Tumor location (Upper and middle vs. lower)     | 0.844                    |                     |          | 0.936            |                     |          |
| Surgical procedure                              |                          |                     |          |                  |                     |          |
| Lobectomy (reference)                           | reference                | reference           |          | reference        | reference           |          |
| Segmentectomy                                   | 0.97                     |                     |          | 0.945            |                     |          |
| Wedge resection                                 | 0.005                    | 2.013 (1.079-3.757) | 0.028    | < 0.001          | 3.685 (1.911-7.106) | < 0.001  |
| Percentage of solid subtype (> 5% vs. ≤ 5%)     | 0.057                    | 1.288 (0.762-2.263) | 0.36     | 0.002            | 1.436 (0.785-2.628) | 0.24     |
| Percentage of acinar subtype (> 5% vs. ≤ 5%)    | 0.836                    |                     |          | 0.812            |                     |          |
| Percentage of papillary subtype (> 5% vs. ≤ 5%) | 0.235                    |                     |          | 0.386            |                     |          |
| Percentage of lepidic subtype (> 5% vs. ≤ 5%)   | 0.204                    |                     |          | 0.036            | 0.513 (0.258-1.02)  | 0.057    |

|                                                 |           |                     |         |           |                     |         |
|-------------------------------------------------|-----------|---------------------|---------|-----------|---------------------|---------|
| Lymph node status (N1, N2 vs. N0)               | < 0.001   | 5.771 (3.36-9.911)  | < 0.001 | < 0.001   | 6.54 (3.519-12.152) | < 0.001 |
| <b>Percentage of MIP &gt; 5% (n = 333)</b>      |           |                     |         |           |                     |         |
| Age (> 65 vs. ≤ 65)                             | 0.941     |                     |         | 0.773     |                     |         |
| Gender (male vs. female)                        | 0.129     |                     |         | 0.190     |                     |         |
| Smoking (current or ex vs. non-smoker)          | 0.424     |                     |         | 0.123     |                     |         |
| COPD (present vs. absent)                       | 0.635     |                     |         | 0.098     | 1.113 (0.403-3.078) | 0.836   |
| Cardiovascular disease (present vs. absent)     | 0.264     |                     |         | 0.028     | 1.787 (0.696-4.589) | 0.228   |
| Diabetes mellitus (present vs. absent)          | 0.308     |                     |         | 0.238     |                     |         |
| FEV1 % (> 70 vs. ≤ 70)                          | 0.589     |                     |         | 0.776     |                     |         |
| CEA (> 10 vs. ≤ 10 ng/ml)                       | 0.048     | 1.48 (0.986-2.222)  | 0.059   | 0.132     |                     |         |
| VPI (present vs. absent)                        | 0.281     |                     |         | 0.513     |                     |         |
| VATS (yes vs. no)                               | 0.272     |                     |         | 0.175     |                     |         |
| Tumor location (Upper and middle vs. lower)     | 0.543     |                     |         | 0.914     |                     |         |
| Surgical procedure                              |           |                     |         |           |                     |         |
| Lobectomy (reference)                           | reference | reference           |         | reference | reference           |         |
| Segmentectomy                                   | 0.002     | 1.966 (1.169-3.307) | 0.011   | 0.002     | 2.24 (1.111-4.513)  | 0.024   |
| Wedge resection                                 | < 0.001   | 2.508 (1.679-3.747) | < 0.001 | < 0.001   | 3.086 (1.919-4.962) | < 0.001 |
| Percentage of solid subtype (> 5% vs. ≤ 5%)     | 0.007     | 1.35 (0.946-1.928)  | 0.099   | 0.001     | 1.514 (0.959-2.39)  | 0.075   |
| Percentage of acinar subtype (> 5% vs. ≤ 5%)    | 0.891     |                     |         | 0.837     |                     |         |
| Percentage of papillary subtype (> 5% vs. ≤ 5%) | 0.948     |                     |         | 0.868     |                     |         |
| Percentage of lepidic subtype (> 5% vs. ≤ 5%)   | 0.826     |                     |         | 0.390     |                     |         |
| Lymph node status (N1, N2 vs. N0)               | < 0.001   | 2.764 (1.918-3.98)  | < 0.001 | < 0.001   | 3.024 (1.917-4.77)  | < 0.001 |

Variables with *P*-value < 0.1 in univariate models were analyzed in multivariate analysis model.

COPD, chronic obstructive pulmonary disease; FEV1, forced expiratory volume in one second; CEA, carcinoembryonic antigen; VPI, visceral pleural invasion; VATS, video-assisted thoracoscopic surgery; HR, hazard ratio; CI, confidence interval.

Table 5. Clinicopathological characteristics of the study and validation cohorts

| Variables                         | Study cohort (n = 147) | Validation cohort (n = 120) |
|-----------------------------------|------------------------|-----------------------------|
| Age                               |                        |                             |
| ≤ 65                              | 92 (62.6)              | 73 (60.9)                   |
| > 65                              | 55 (37.4)              | 47 (39.1)                   |
| Gender                            |                        |                             |
| Male                              | 76 (51.7)              | 51 (42.5)                   |
| Female                            | 71 (48.3)              | 69 (57.5)                   |
| Smoking                           |                        |                             |
| Non-smoker                        | 117 (79.6)             | 98 (81.6)                   |
| Current or ex-smoker              | 30 (20.4)              | 22 (18.4)                   |
| CEA                               |                        |                             |
| ≤ 10 ng/ml                        | 129 (87.8)             | 103 (85.8)                  |
| > 10 ng/ml                        | 18 (12.2)              | 17 (14.2)                   |
| Tumor location                    |                        |                             |
| Upper and Middle                  | 89 (60.5)              | 64 (53.3)                   |
| Lower                             | 58 (39.5)              | 56 (46.7)                   |
| Surgical procedure                |                        |                             |
| Lobectomy                         | 108 (73.5)             | 101 (84.2)                  |
| Wedge resection                   | 29 (19.7)              | 13 (10.8)                   |
| Segmentectomy                     | 10 (6.8)               | 6 (5)                       |
| Tumor size, (pathological)        |                        |                             |
| ≤ 1 cm                            | 29 (19.7)              | 34 (28.3)                   |
| 1-2 cm                            | 118 (80.3)             | 86 (71.7)                   |
| STAS                              |                        |                             |
| Absent                            | 120 (81.9)             | 94 (78.3)                   |
| Present                           | 27 (18.1)              | 26 (21.7)                   |
| VPI                               |                        |                             |
| Absent                            | 124 (84.3)             | 99 (82.5)                   |
| Present                           | 23 (15.7)              | 21 (17.5)                   |
| Predominant histological subtypes |                        |                             |
| Lepidic                           | 2 (1.4)                | 1 (0.8)                     |
| Acinar                            | 77 (52.4)              | 49 (40.8)                   |
| Papillary                         | 53 (36.1)              | 48 (40)                     |
| Micropapillary                    | 3 (2)                  | 9 (7.5)                     |
| Solid                             | 12 (8.2)               | 13 (10.8)                   |

CEA: carcinoembryonic antigen; STAS: tumor spread through air space; VPI: visceral pleural invasion.
